# Supplementary material for: Attrition-induced spontaneous chiral amplification of the γ polymorphic modification of glycine
Source: Royal Society of Chemistry journal article supplement (doi:10.1039/c4ce02434f), 2015-01-01
Supplement: c4ce02434f1.pdf [file c4ce02434f1.pdf]

Electronic Supplementary Material (ESI) for CrystEngComm.

This journal is © The Royal Society of Chemistry 2014

## **Attrition-induced spontaneous chiral amplification of the $\gamma$ polymorphic modification of glycine**

**Arkadii V. Tarasevych,<sup>\*a,b,c</sup> Alexander E. Sorochinsky,<sup>b</sup> Valery P. Kukhar,<sup>b</sup> Loïc Toupet,<sup>d</sup> Jeanne Crassous,<sup>\*d</sup> Jean-Claude Guillemin<sup>\*a</sup>**

<sup>a</sup> *Institut des Sciences Chimiques de Rennes, Ecole Nationale Supérieure de Chimie de Rennes, CNRS, UMR 6226, 11 Allée de Beaulieu, CS50837, 35708 Rennes Cedex 7, France.*

*Fax: (+33) 2-23-23-81-08; E-mail: jean-claude.guillemin@ensc-rennes.fr*

<sup>b</sup> *Institut of Bioorganic Chemistry and Petrochemistry, National Academy of Sciences of Ukraine, Murmanska Street 1, 02660 Kyiv 94, Ukraine.*

<sup>c</sup> *Boreskov Institute of Catalysis, Siberian Branch of the Russian Academy of Sciences, pr. Akademika Lavrentieva 5, 630090 Novosibirsk, Russia. E-mail: arkadii.v.tarasevych@catalysis.ru*

<sup>d</sup> *Institut des Sciences Chimiques de Rennes, UMR 6226, Institut de Physique de Rennes, UMR 6251, Université de Rennes 1, CNRS, Campus de Beaulieu, 35042 Rennes Cedex, France. Fax: (+33) 2-23-23-69-39; E-mail: jeanne.crassous@univ-rennes1.fr*

## CONTENT

|                                                                                                                      |        |
|----------------------------------------------------------------------------------------------------------------------|--------|
| Experimental section.....                                                                                            | S3     |
| Preparation of glycine solution.....                                                                                 | S3     |
| Crystallization without stirring.....                                                                                | S3     |
| Crystallization under stirring.....                                                                                  | S3     |
| Crystallization under abrasive grinding conditions.....                                                              | S4     |
| Control of $\gamma$ -glycine chirality under abrasive grinding conditions<br>using enantiopure L- and D-alanine..... | S4     |
| Table S1. Measured CD signals and<br>calculated enantiomorphous excess of $\gamma$ -Gly samples.....                 | S5     |
| Fig. S1. Powder Debye-Scherrer diagram.....                                                                          | S6     |
| Fig. S2 The evolution of optical activity in the $\gamma$ -Gly crystalline phase.....                                | S7     |
| Tables S2-S5. X-ray Crystallographic Study.....                                                                      | S8-S12 |
| Comments on X-ray analyses.....                                                                                      | S13    |
| References.....                                                                                                      | S14    |

## **EXPERIMENTAL SECTION**

### **Preparation of glycine solution**

The saturated aqueous solution of glycine was obtained by intensive stirring of an excess of glycine (33 g) with sodium chloride solution (100 g/L, 110 g) during 5 hours at room temperature. An excess of crystals of glycine was removed by filtration through a Schott glass filter (Duran, grade 3, porosity 16-40  $\mu\text{m}$ ) using vacuum. The obtained solution was used for crystallizations under different conditions.

### **Crystallization without stirring**

The solution of glycine prepared above was transferred to a crystallizing dish and covered with a filter paper for the protection against dust. Nucleation was observed after 3-5 days, and in 1-2 weeks single crystals of  $\gamma$ -Gly were formed. Using a spatula and a triangle we collected individual single crystals of  $\gamma$ -glycine, and the residual solution was removed from the surface of the crystals using a filter paper. The solid state measurements of circular dichroism were conducted in potassium bromide ( $100 \pm 3$  mg for each pellet) with known amount of material in the pellet (0.5 - 5 mg of Gly) in the UV range 200-300 or 200-230 nm (Table S1, entries 1-7). The crystal structure of  $\gamma$  polymorphic modification has been characterized by powder X-ray diffraction (Fig. S1 top, blue digram).

### **Crystallization under stirring**

Aliquots (10 mL) of the saturated aqueous solution of glycine with sodium chloride were transferred to 25 mL flasks equipped with stir bars. Crystallization started after 3 days of an intensive stirring ( $\sim 800$  rpm) as a result of slow evaporation. Due to the continuous crushing of the formed crystals, the CD measurements were conducted using the formed microcrystalline powder which was separated by vacuum filtration on a glass filter and dried on air at  $40^\circ\text{C}$  overnight (Table S1, entries 8-18). Powder XRD are presented on Fig. S1 (top, red digram).

### **Crystallization under abrasive grinding conditions**

$\gamma$ -glycine (1.311 g, 0° CD signal, obtained as a result of crystallization without stirring) was put into the aqueous saturated solution of glycine with sodium chloride (NaCl 100 g/L, 12 mL). The mixture was stirred using a magnetic bar with the addition of a considerable amount of glass beads (soda-lime glass, 3 mm diameter, 31.3 g). For measurements, several hundreds of  $\mu$ L of the slurry were taken using a Pasteur pipette, the solution was removed by filtration on a Schott glass microfilter and the solid was dried up at 40°C during several hours (Table S1, entries 19-22).

### **Control of $\gamma$ -glycine chirality under abrasive grinding conditions using enantiopure L- and D-alanine**

A mixture of  $\gamma$ -glycine (950 mg) together with either of enantiopure alanine (L or D, 50 mg) was put into the aqueous saturated solution of glycine with sodium chloride (NaCl 100 g/L, 12 mL). The mixture was stirred using a magnetic bar with the addition of a considerable amount of glass beads (soda-lime glass, 3 mm diameter, ~30 g). The samples for CD measurements were taken as described above.

**Table S1.**

| Entry | CD signal, specific ellipticity (mdeg/mg) at ~<br>210 nm | Estimated absolute (either “+” or “-”)<br>enantiomorphous excess, % |
|-------|----------------------------------------------------------|---------------------------------------------------------------------|
| 1     | ~0                                                       | 0                                                                   |
| 2     | -34.34                                                   | 49.1                                                                |
| 3     | +34.11                                                   | 48.7                                                                |
| 4     | -24.06                                                   | 34.4                                                                |
| 5     | -39.8                                                    | 56.9                                                                |
| 6     | -40.2                                                    | 57.4                                                                |
| 7     | -23.9                                                    | 34.1                                                                |
| 8     | -1.61                                                    | 2.3                                                                 |
| 9     | +17.93                                                   | 25.6                                                                |
| 10    | +1.06                                                    | 1.5                                                                 |
| 11    | +7.66                                                    | 10.9                                                                |
| 12    | +5.57                                                    | 7.9                                                                 |
| 13    | +5.41                                                    | 7.7                                                                 |
| 14    | -3.25                                                    | 4.6                                                                 |
| 15    | -22.21                                                   | 31.7                                                                |
| 16    | -3.3                                                     | 4.7                                                                 |
| 17    | ~0                                                       | 0                                                                   |
| 18    | +3.26                                                    | 4.6                                                                 |
| 19    | -70                                                      | <b>~100</b>                                                         |
| 20    | +6.0                                                     | 8.6                                                                 |
| 21    | +4.5                                                     | 6.4                                                                 |
| 22    | ~0                                                       | 0                                                                   |

Measured CD signals and calculated enantiomorphous excess of  $\gamma$ -Gly samples.

- a) entries 1-7, single crystal obtained without stirring;
- b) entries 8-18, intensively stirred solution;
- c) entries 19-22, using glass beads.

## Powder Debye-Scherrer diagram

The powder XRD diffractograms of (i) commercially available glycine (black), (ii) ground crystals obtained by slow growing from NaCl aqueous solution according to the above described method (red) and (iii) crystals formed under the same conditions but applying intensive stirring (blue) are shown on Figure S1. It is interesting to note that the commercially available sample of glycine (Aldrich), that was used for the obtaining of  $\gamma$  form, alongside with the kinetically favorable  $\alpha$  modification contained  $\gamma$ -Gly as well (Figure S1, top).

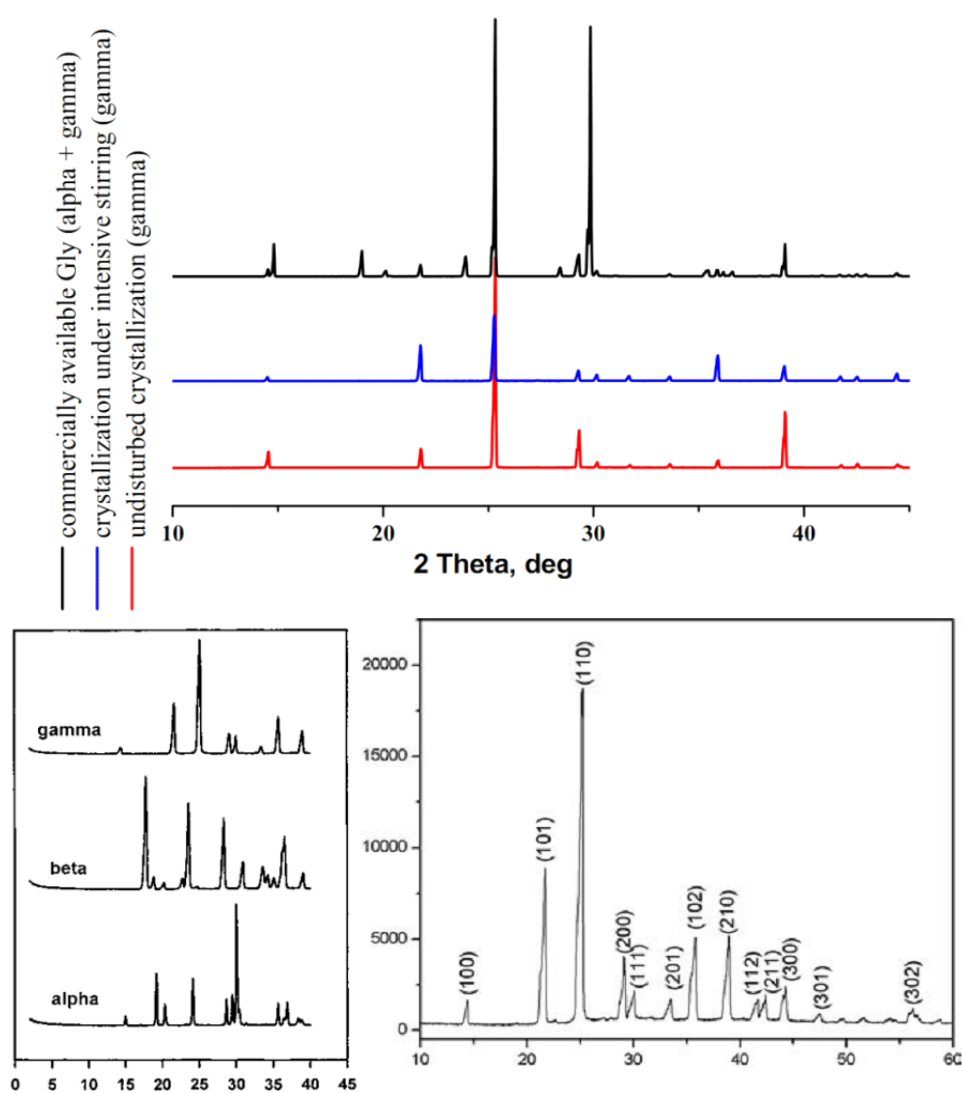

**Fig. S1** Powder X-ray diffractograms of  $\alpha$ ,  $\beta$  and  $\gamma$ -Gly: our experimental data (top); literature data: bottom left ( $\alpha$ ,  $\beta$ ,  $\gamma$ )<sup>1</sup> and right ( $\gamma$ )<sup>2</sup>

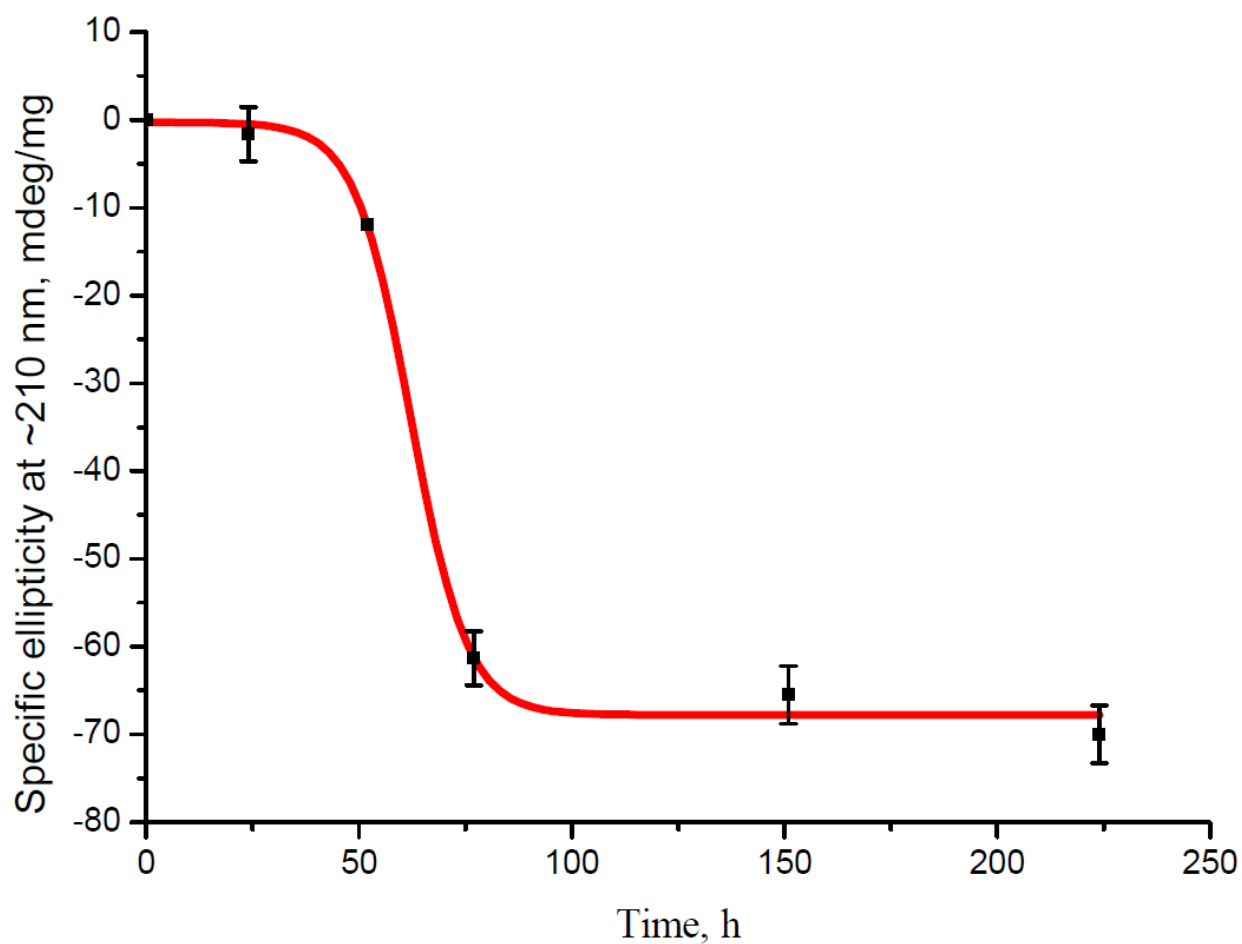

**Fig. S2** The evolution of optical activity in the  $\gamma$ -Gly crystalline phase as a result attrition-enhanced grinding using glass beads.

## X-ray Crystallographic Study

Single crystal data collection were performed at 200 K with a SuperNova Agilent diffractometer with Cu-K $\alpha$  radiation ( $\alpha = 1.54184 \text{ \AA}$ ). Reflections were indexed, Lorentz-polarization corrected and integrated by the CrysAlis program.<sup>3</sup> Structure determinations were performed by direct methods with the program SIR2002,<sup>4</sup> that revealed all the non hydrogen atoms. SHELXL program<sup>5</sup> was used to refine the structures by full-matrix least-squares based on  $F^2$ . All non-hydrogen atoms were refined with anisotropic displacement parameters. Hydrogen atoms were found with Fourier Difference map. Flack x parameter for absolute configuration is determined using 150 quotients  $[(I^+)-(I^-)]/[(I^+)+(I^-)]$ .<sup>6</sup>

Atomic scattering factors for all atoms were taken from International Tables for X-ray Crystallography.<sup>7</sup> Details of crystal data and structural refinements are given in Tables S2-S5. CCDC reference numbers 1037456, 1037459, 1037299, 1037358 contain the supplementary crystallographic data for this paper. These data can be obtained free of charge at [www.ccdc.cam.ac.uk/conts/retrieving.html](http://www.ccdc.cam.ac.uk/conts/retrieving.html) or from the Cambridge Crystallographic Data Center, 12 union Road, Cambridge CB2 1EZ, UK; Fax: (internat.) + 44-1223-336-033; E-mail: [deposit@ccdc.cam.ac.uk](mailto:deposit@ccdc.cam.ac.uk).



**Table S2.** Crystal data and structure refinement for gly\_d\_Cu\_200k (CCDC1037456).

|                                 |                                                                                                                |
|---------------------------------|----------------------------------------------------------------------------------------------------------------|
| Identification code             | shelx                                                                                                          |
| Empirical formula               | C <sub>2</sub> H <sub>5</sub> NO <sub>2</sub>                                                                  |
| Formula weight                  | 75.07                                                                                                          |
| Temperature                     | 200(2) K                                                                                                       |
| Wavelength                      | 1.54184 Å                                                                                                      |
| Crystal system, space group     | Trigonal, <i>P</i> 3 <sub>1</sub>                                                                              |
| Unit cell dimensions            | a = 7.0047(2) Å    alpha = 90 deg.<br>b = 7.0047(2) Å    beta = 90 deg.<br>c = 5.4772(3) Å    gamma = 120 deg. |
| Volume                          | 232.738(18) Å <sup>3</sup>                                                                                     |
| Z, Calculated density           | 3, 1.607 Mg/m <sup>3</sup>                                                                                     |
| Absorption coefficient          | 1.243 mm <sup>-1</sup>                                                                                         |
| F(000)                          | 120                                                                                                            |
| Crystal size                    | 0.319 x 0.074 x 0.066 mm                                                                                       |
| Theta range for data collection | 7.301 to 49.723 deg.                                                                                           |
| Limiting indices                | -6 ≤ h ≤ 6, -6 ≤ k ≤ 6, -5 ≤ l ≤ 5                                                                             |
| Reflections collected / unique  | 1610 / 309 [R(int) = 0.0451]                                                                                   |
| Completeness to theta = 67.684  | 56.2 %                                                                                                         |
| Absorption correction           | Semi-empirical from equivalents                                                                                |
| Max. and min. transmission      | 1.00000 and 0.52487                                                                                            |
| Refinement method               | Full-matrix least-squares on F <sup>2</sup>                                                                    |

|                                      |                                       |
|--------------------------------------|---------------------------------------|
| Data / restraints / parameters       | 309 / 1 / 47                          |
| Goodness-of-fit on $F^2$             | 1.229                                 |
| Final R indices [ $I > 2\sigma(I)$ ] | R1 = 0.0770, wR2 = 0.2202             |
| R indices (all data)                 | R1 = 0.0770, wR2 = 0.2202             |
| Absolute structure parameter         | -0.1(4)                               |
| Extinction coefficient               | 0.25(9)                               |
| Largest diff. peak and hole          | 0.480 and -0.413 e. $\text{\AA}^{-3}$ |

**Table S3.** Crystal data and structure refinement for gly\_f\_cu\_200k (CCDC 1037459).

|                                 |                                                                                                                |
|---------------------------------|----------------------------------------------------------------------------------------------------------------|
| Identification code             | shelx                                                                                                          |
| Empirical formula               | C <sub>2</sub> H <sub>5</sub> NO <sub>2</sub>                                                                  |
| Formula weight                  | 75.07                                                                                                          |
| Temperature                     | 200(2) K                                                                                                       |
| Wavelength                      | 1.54184 Å                                                                                                      |
| Crystal system, space group     | Trigonal, <i>P</i> 3 <sub>1</sub>                                                                              |
| Unit cell dimensions            | a = 7.0055(3) Å    alpha = 90 deg.<br>b = 7.0055(3) Å    beta = 90 deg.<br>c = 5.4774(2) Å    gamma = 120 deg. |
| Volume                          | 232.80(2) Å <sup>3</sup>                                                                                       |
| Z, Calculated density           | 3, 1.606 Mg/m <sup>3</sup>                                                                                     |
| Absorption coefficient          | 1.242 mm <sup>-1</sup>                                                                                         |
| F(000)                          | 120                                                                                                            |
| Crystal size                    | 0.251 x 0.220 x 0.056 mm                                                                                       |
| Theta range for data collection | 7.300 to 49.717 deg.                                                                                           |
| Limiting indices                | -6 ≤ h ≤ 6, -6 ≤ k ≤ 6, -5 ≤ l ≤ 5                                                                             |
| Reflections collected / unique  | 1674 / 316 [R(int) = 0.0353]                                                                                   |
| Completeness to theta = 67.684  | 56.2 %                                                                                                         |
| Absorption correction           | Semi-empirical from equivalents                                                                                |
| Max. and min. transmission      | 1.00000 and 0.46934                                                                                            |
| Refinement method               | Full-matrix least-squares on F <sup>2</sup>                                                                    |

|                                      |                                       |
|--------------------------------------|---------------------------------------|
| Data / restraints / parameters       | 316 / 1 / 47                          |
| Goodness-of-fit on $F^2$             | 1.146                                 |
| Final R indices [ $I > 2\sigma(I)$ ] | R1 = 0.0210, wR2 = 0.0547             |
| R indices (all data)                 | R1 = 0.0212, wR2 = 0.0550             |
| Absolute structure parameter         | -0.2(3)                               |
| Extinction coefficient               | 0.172(19)                             |
| Largest diff. peak and hole          | 0.115 and -0.088 e. $\text{\AA}^{-3}$ |

**Table S4.** Crystal data and structure refinement for gly\_g\_cu\_200k (CCDC 1037299).

|                                 |                                                                                                                |
|---------------------------------|----------------------------------------------------------------------------------------------------------------|
| Identification code             | shelx                                                                                                          |
| Empirical formula               | C <sub>2</sub> H <sub>5</sub> NO <sub>2</sub>                                                                  |
| Formula weight                  | 75.07                                                                                                          |
| Temperature                     | 200(2) K                                                                                                       |
| Wavelength                      | 1.54184 Å                                                                                                      |
| Crystal system, space group     | Trigonal, <i>P</i> 3 <sub>1</sub>                                                                              |
| Unit cell dimensions            | a = 7.0051(3) Å    alpha = 90 deg.<br>b = 7.0051(3) Å    beta = 90 deg.<br>c = 5.4758(2) Å    gamma = 120 deg. |
| Volume                          | 232.71(2) Å <sup>3</sup>                                                                                       |
| Z, Calculated density           | 3, 1.607 Mg/m <sup>3</sup>                                                                                     |
| Absorption coefficient          | 1.243 mm <sup>-1</sup>                                                                                         |
| F(000)                          | 120                                                                                                            |
| Crystal size                    | 0.247 x 0.214 x 0.116 mm                                                                                       |
| Theta range for data collection | 7.301 to 49.725 deg.                                                                                           |
| Limiting indices                | -6 ≤ h ≤ 6, -6 ≤ k ≤ 6, -5 ≤ l ≤ 5                                                                             |
| Reflections collected / unique  | 1687 / 316 [R(int) = 0.0302]                                                                                   |
| Completeness to theta = 67.684  | 56.2 %                                                                                                         |
| Absorption correction           | Semi-empirical from equivalents                                                                                |
| Max. and min. transmission      | 1.00000 and 0.66047                                                                                            |
| Refinement method               | Full-matrix least-squares on F <sup>2</sup>                                                                    |

|                                      |                                       |
|--------------------------------------|---------------------------------------|
| Data / restraints / parameters       | 316 / 1 / 47                          |
| Goodness-of-fit on $F^2$             | 0.668                                 |
| Final R indices [ $I > 2\sigma(I)$ ] | R1 = 0.0269, wR2 = 0.0724             |
| R indices (all data)                 | R1 = 0.0269, wR2 = 0.0724             |
| Absolute structure parameter         | 0.1(4)                                |
| Extinction coefficient               | 0.19(2)                               |
| Largest diff. peak and hole          | 0.108 and -0.128 e. $\text{\AA}^{-3}$ |

**Table S5.** Crystal data and structure refinement for gly\_h\_cu\_200k (CCDC 1037358).

|                                 |                                                                                                                |
|---------------------------------|----------------------------------------------------------------------------------------------------------------|
| Identification code             | shelx                                                                                                          |
| Empirical formula               | C <sub>2</sub> H <sub>5</sub> NO <sub>2</sub>                                                                  |
| Formula weight                  | 75.07                                                                                                          |
| Temperature                     | 200(2) K                                                                                                       |
| Wavelength                      | 1.54184 Å                                                                                                      |
| Crystal system, space group     | Trigonal, <i>P</i> 3 <sub>1</sub>                                                                              |
| Unit cell dimensions            | a = 7.0045(3) Å    alpha = 90 deg.<br>b = 7.0045(3) Å    beta = 90 deg.<br>c = 5.4789(3) Å    gamma = 120 deg. |
| Volume                          | 232.80(2) Å <sup>3</sup>                                                                                       |
| Z, Calculated density           | 3, 1.606 Mg/m <sup>3</sup>                                                                                     |
| Absorption coefficient          | 1.242 mm <sup>-1</sup>                                                                                         |
| F(000)                          | 120                                                                                                            |
| Crystal size                    | 0.229 x 0.084 x 0.068 mm                                                                                       |
| Theta range for data collection | 7.301 to 49.718 deg.                                                                                           |
| Limiting indices                | -6 ≤ h ≤ 6, -6 ≤ k ≤ 6, -5 ≤ l ≤ 5                                                                             |
| Reflections collected / unique  | 1728 / 305 [R(int) = 0.0336]                                                                                   |
| Completeness to theta = 67.684  | 56.2 %                                                                                                         |
| Absorption correction           | Semi-empirical from equivalents                                                                                |
| Max. and min. transmission      | 1.00000 and 0.55530                                                                                            |
| Refinement method               | Full-matrix least-squares on F <sup>2</sup>                                                                    |

|                                      |                                       |
|--------------------------------------|---------------------------------------|
| Data / restraints / parameters       | 305 / 1 / 47                          |
| Goodness-of-fit on $F^2$             | 1.229                                 |
| Final R indices [ $I > 2\sigma(I)$ ] | R1 = 0.0181, wR2 = 0.0522             |
| R indices (all data)                 | R1 = 0.0184, wR2 = 0.0526             |
| Absolute structure parameter         | 0.1(4)                                |
| Extinction coefficient               | 0.085(12)                             |
| Largest diff. peak and hole          | 0.087 and -0.079 e. $\text{\AA}^{-3}$ |



## Comments on X-ray analyses

The four samples are presumably enantiomorphs of the same handedness ( $P3_1$ ) because the indexation of data gives a result between 95 and 98%. The opposite configuration ( $P3_2$ ) have been tested and the results are:

**gly\_d\_Cu\_200k** (CCDC 1037456) : 0.8(3)

**gly\_h\_cu\_200k** (CCDC 1037358) : 1.1(3)

**gly\_g\_cu\_200k** (CCDC 1037299) : 0.9(4)

**gly\_f\_cu\_200k** (CCDC 1037459) : 0.9(3)

The large uncertainty of the Flack parameters (determined with only 150 quotients) is probably due to a lack of resolution since the resolution cannot be below 0.772 with the used diffractometer and Cu source.

Two versions of PLATON, 2005 and 2014, have been used. The results are the following:

**gly\_d\_Cu\_200k** (CCDC 1037456)

- 2014 : BASF 0.16 and -1-10 0 1 0 0 0 -1 ; the corresponding refinement with TWIN and BASF instructions do not give significantly different results.

- 2005 : "floating point stack fault"

**gly\_h\_cu\_200k** (CCDC 1037358)

- 2014 : "too few obs.GT.fcalc"

- BASF : 0.0

**gly\_g\_cu\_200k** (CCDC 1037299)

- 2014 : "no twin law detected"

- 2005 : "floating point stack fault"

**gly\_f\_cu\_200k** (CCDC 1037459)

- 2014 : "too few obs.GT.fcalc"

- 2005 : "floating point stack fault"

## References

- 1 S. Chongprasert, S.A. Knopp and S.L. Nail, *J. Pharm. Sci.*, 2001, **90**, 1720-1728.
- 2 C. Yogambal, R. Ezhil Vizhi and D. Rajan Babu, *Cryst. Res. Technol.*, **2014**, 10.1002/crat.201400151.
- 3 CrysAlisPro, Agilent Technologies. Version 1.171.37.34 (release 22-05-2014 CrysAlis171.NET)
- 4 A. Altomare, M.C. Burla, M. Camalli, G. Cascarano, C. Giacovazzo, A. Guagliardi, A.G.G. Moliterni, G. Polidori and R. Spagna, *J. Appl. Cryst.* 1999, **32**, 115-119.
- 5 SHELXL-2014/6; Sheldrick G.M., *SHELX97*, Program for the Refinement of Crystal Structures, University of Göttingen, Germany, **2014**.
- 6 International Tables for X-ray Crystallography, vol C, Ed. Kluwer, Dordrech, **1992**.
- 7 S. Parsons, H.D. Flack and T. Wagner, *Acta Cryst.* 2013, **B69**, 249-259.
